# Supplementary material for: Surface states mediated charge transfer in redox behavior of hemin at GaAs(100) electrodes
Source: Royal Society of Chemistry journal article supplement (doi:10.1039/d0ra01508c), 2020-01-01
Supplement: d0ra01508c1.pdf [file d0ra01508c1.pdf]

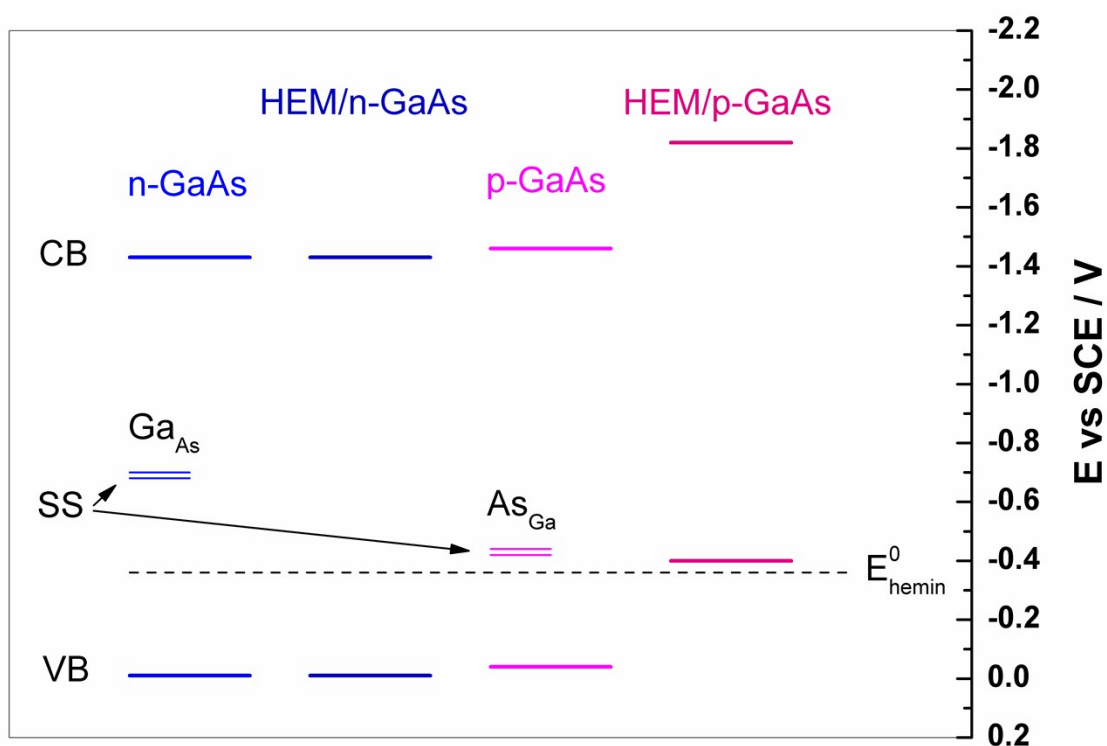

Energy bands diagram showing the relative position on the electrochemical scale of the conduction (CB) and the valence (VB) band-edges for the bare and the hemin-covered n- and p-GaAs(100) with respect to the formal potential,  $E^0$ , of the hemin redox process in PBS solution. The positions of the main groups of surface states (SS),  $Ga_{As}$  and  $As_{Ga}$ , in the semiconductor bandgap are also shown.
